# Supplementary material for: Natural mucosal barriers and COVID-19 in children
Source: JCI journal article supplement (doi:10.1172/jci.insight.148694), 2021-04-06
Supplement: sd3 [file 3]

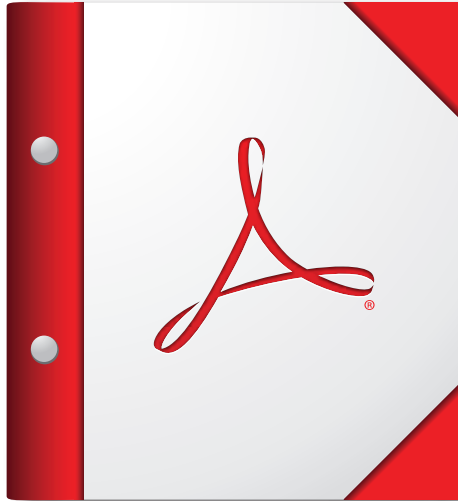

**For the best experience, open this PDF portfolio in  
Acrobat X or Adobe Reader X, or later.**

**Get Adobe Reader Now!**
